# Supplementary material
Source: PubMed Central journal article supplement (PMC11081397)
Supplement: NIHMS1984740-supplement-Materials_List.pdf [file NIHMS1984740-supplement-Materials_List.pdf]

| Name of Material/ Equipment                                   | Company                         | Catalog Number                                  | Comments/Description                                             |
|---------------------------------------------------------------|---------------------------------|-------------------------------------------------|------------------------------------------------------------------|
| acrylamide                                                    | Millipore Sigma                 | 1490-100ML                                      |                                                                  |
| ammonium persulfate                                           | VWR                             | BDH9214-500G                                    |                                                                  |
| anti-GFP rabbit polyclonal antibody                           | Torrey Pines BioLabs            | TP-401                                          |                                                                  |
| anti-guinea pig IgG goat polyclonal antibody, Alexa Fluor 568 | Thermo Fisher Scientific        | A-11075                                         |                                                                  |
| anti-rabbit IgG goat polyclonal antibody, Alexa Fluor 488     | Thermo Fisher Scientific        | A-11008                                         |                                                                  |
| bisacrylamide                                                 | Research Products International | A11275                                          |                                                                  |
| bovine serum albumin (30% solution)                           | Millipore Sigma                 | A7284                                           |                                                                  |
| conical tubes, 50 ml                                          | fisherscientific                | 21008-940                                       |                                                                  |
| coverlip glass, square 22 mm                                  | VWR                             | 48366-227                                       |                                                                  |
| coverslip glass, rectangular 40 mm x 24 mm                    | VWR                             | 48393-230                                       |                                                                  |
| glass capillaries for pulling needles                         | World Precision Instruments     | TW100F-4                                        |                                                                  |
| glass microinjection needles (pre-pulled)                     | World Precision Instruments     | TIP10LT                                         |                                                                  |
| guanidine HCl                                                 | VWR                             | 101970-606                                      |                                                                  |
| heptane                                                       | VWR                             | EM-HX0078-1                                     |                                                                  |
| latex pipet bulbs                                             | VWR                             | 82024-554                                       |                                                                  |
| methanol                                                      | VWR                             | BDH1135-4LP                                     |                                                                  |
| methylacrylic acid N-hydroxysuccinimidyl ester                | VWR                             | 730300-1G                                       |                                                                  |
| microfuge tube, 1.5 mL                                        | VWR                             | 20170-038                                       |                                                                  |
| multi-well plate, 6-well                                      | Genesee                         | 25-100                                          |                                                                  |
| paraformaldehyde (16%, EM-grade, methanol-free)               | Electron Microscopy Sciences    | 509804487 (Fisher)                              |                                                                  |
| Pasteur pipet (2 mL, short tip)                               | VWR                             | 14673-010                                       |                                                                  |
| PDMS kit (Sylgard 184 Kit, base and curing agent)             | VWR                             | 102092-312                                      |                                                                  |
| Petri plates                                                  | Genesee                         | 32-107                                          |                                                                  |
| phosphate-buffered saline (10x solution)                      | VWR                             | 97063-660                                       |                                                                  |
| Poly-L-lysine solution (0.1% solution)                        | VWR                             | P8920-100ML                                     |                                                                  |
| Proteinase K                                                  | Thermo Fisher Scientific        | E00491                                          |                                                                  |
| scintillation vials (30 ml)                                   | VWR                             | 66022-128                                       |                                                                  |
| sodium acrylate                                               | VWR                             | 101181-226                                      |                                                                  |
| sodium azide (powder)                                         | Millipore Sigma                 | 71289                                           | make a 1% w/v working stock; acute POISON at this concentration! |
| Streptavidin, Alexa Fluor 488                                 | Thermo Fisher Scientific        | S32354                                          |                                                                  |
| TAE (50x)                                                     | VWR                             | 97063-692                                       |                                                                  |
| tape (double-sided, 1 inch wide)                              | Scotch 3M                       | 665 Scotch double sided 1inch/1296 inches Boxed |                                                                  |
| TEMED                                                         | Thermo Fisher Scientific        | PI17919                                         |                                                                  |
| TEMPO                                                         | VWR                             | EM8.14681.0005                                  | catalytic oxidant                                                |
| Tween-20                                                      | VWR                             | 97063-872                                       | extremely viscous when pure; make a 10% working stock with water |
| Zeiss LSM 900                                                 | Zeiss                           |                                                 | Laser scanning microscope used without AiryScan                  |
